# Supplementary material for: Addressing knowledge gaps in Surgical Safety Checklist use: statistical process control analysis of a surgical quality improvement programme in Ethiopia
Source: PubMed Central journal article supplement — Br J Surg. 2023 Aug 8;110(11):1511–7. doi: 10.1093/bjs/znad234 (PMC10564401; doi:10.1093/bjs/znad234), 2023-08-08

# Addressing knowledge gaps in Surgical Safety Checklist use: a statistical process analysis of a surgical quality improvement program in Ethiopia

Maia R. Nofal MD MPH<sup>1,2,3,4</sup>, Nichole Starr MD MP<sup>3,4,5</sup>, Tihitena Negussie Mammo MD<sup>4,6</sup>, Amber W. Trickey PhD MS CPH<sup>2</sup>, Natnael Gebeyehu MD<sup>4,5</sup>, Luca Koritsanszky, CNM, WHNP, MPH<sup>7</sup>, Mechale Alemu MD<sup>8</sup>, Mansi Tara, BDS MPH PMP<sup>4</sup>, Senait Bitew Alemu BSc MPH<sup>4</sup>, Faye Evans MD<sup>4,9,10</sup>, Selam Kahsay MPH<sup>4</sup>, Thomas G. Weiser MD MPH<sup>2,4</sup>

<sup>1</sup>Department of Surgery, Boston Medical Center, Chobanian & Avedisian School of Medicine, Boston, Massachusetts, USA

<sup>2</sup>Department of Surgery, Stanford University, Palo Alto, California, USA

<sup>3</sup>Fogarty International Center, Global Health Equity Scholars Program (D43TW010540), Washington DC, USA

<sup>4</sup>Lifebox Foundation, Addis Ababa, Ethiopia

<sup>5</sup>Department of Surgery, University of California San Francisco, San Francisco, California, USA

<sup>6</sup>Department of Surgery, Addis Ababa University, Ethiopia

<sup>7</sup>Department of Obstetrics and Gynecology, Boston Medical Center, Chobanian & Avedisian School of Medicine, Boston, Massachusetts, USA

<sup>8</sup>Zewditu Memorial Hospital, Addis Ababa, Ethiopia

<sup>9</sup>Department of Anesthesiology, Perioperative and Pain Medicine, Boston Children's Hospital, Boston, Massachusetts, USA

<sup>10</sup>Harvard Medical School, Boston, Massachusetts, USA

## Corresponding author.

Maia R. Nofal, MD MPH  
Boston University Chobanian & Avedisian School of Medicine  
Surgery Education Office  
Boston Medical Center  
85 E. Concord Street, Third Floor  
Boston, MA 02118  
USA

0000-0003-2532-4514

ORCID ID; Twitter

**Supplementary Materials - Index**

## Supplementary Figures and Tables

Table 1. IRR, mean compliance rates, and rate differences by compliance area *page 2*

Figure 1. Study inclusion criteria *page 2*

**Supplementary Figures and Tables**

Table 1. IRR, mean compliance rates, and rate differences by compliance area

| Compliance area      | IRR (95% CI)     | Mean compliance rate (95% CI) |                   | Rate difference (95% CI) | % increase in compliance | P-value of rate difference |
|----------------------|------------------|-------------------------------|-------------------|--------------------------|--------------------------|----------------------------|
|                      |                  | Pre-intervention              | Post-intervention |                          |                          |                            |
| Checklist Compliance | 1.51 (1.18-1.91) | .27 (.23-.32)                 | .41 (.34-.49)     | .14 (.31-.23)            | 52%                      | 0.001                      |
| Sign in              | 1.34 (1.08-1.66) | .39 (.33-.45)                 | .52 (.44-.61)     | .13 (.03-.23)            | 33%                      | 0.010                      |
| Time out             | 1.09 (.94-1.26)  | .69 (.61-.76)                 | .75 (.65-.85)     | .06 (.04-.17)            | 9%                       | 0.250                      |
| Sign out             | 1.20 (.98-1.47)  | .41 (.35-.46)                 | .49 (.41-.57)     | .08 (.00-.17)            | 20%                      | 0.082                      |

Figure 1. Study inclusion criteria

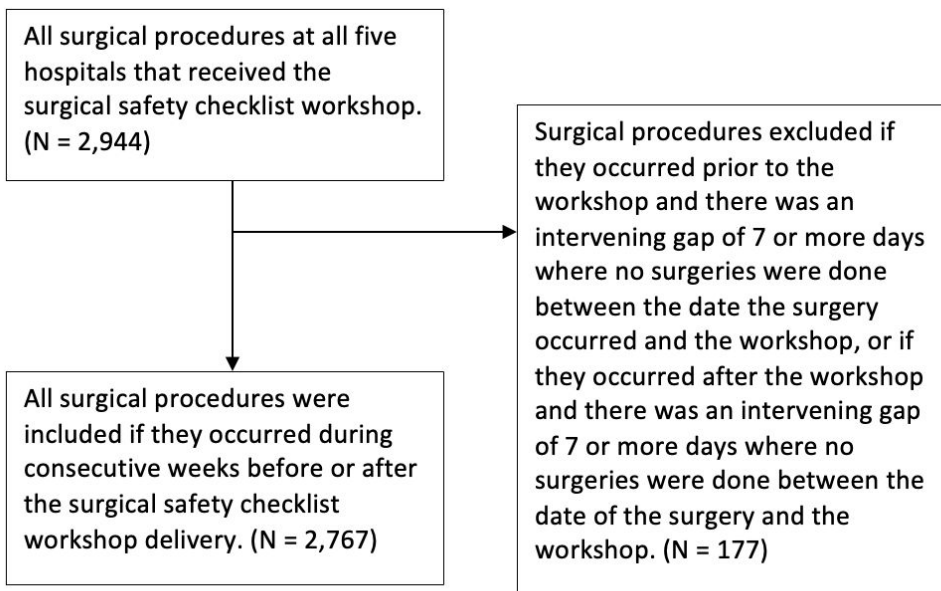

Supplement: znad234_supplementary_data.pdf [file znad234_supplementary_data.pdf]
